# Supplementary material
Source: MDPI journal article supplement (https://www.mdpi.com/2073-4344/9/6/491)
Supplement: s1 [file s1]

# Supporting Information: Synthesis of Spherical TiO<sub>2</sub> Particles with Disordered Rutile Surface for Photocatalytic Hydrogen Production

Na Yeon Kim, Hyeon Kyeong Lee, Jong Tae Moon and Ji Bong Joo \*

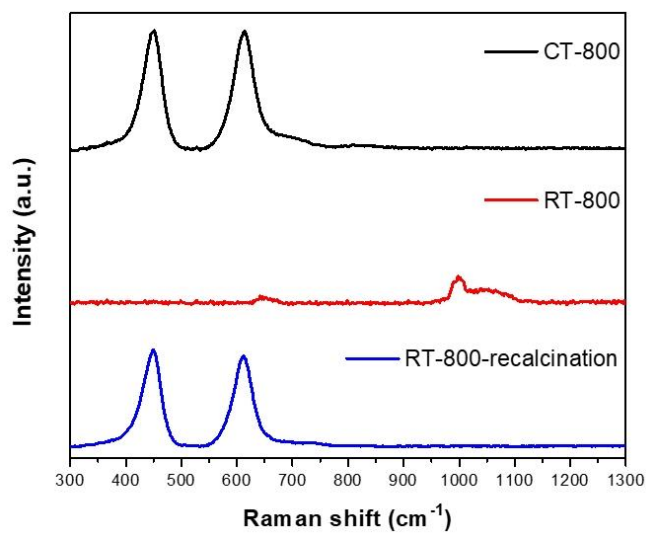

Figure S1. Raman spectra of CT-800, RT-800, and RT-800 recalcination.
